# Supplementary material
Source: publisher site journal article supplement (https://static.cambridge.org/content/id/urn:cambridge.org:id:article:S0899823X20003281/resource/name/S0899823X20003281supp001.doc)
Supplement: Supplementary file 1 [file S0899823X20003281supp001.doc]

**SURVEY QUESTIONS ON CRE GUIDELINES FOR MPCs**

**VA QUERI CARRIAGE Program**

**Survey of Practices for Control of Carbapenem-resistant Enterobacteriaceae (CRE)**

This survey is focused on understanding infection control practices related to CRE in your facility. The VHA 2017 Guideline for Control of Carbapenemase Producing-Carbapenem Resistant *Enterobacteriaceae* (CP-CRE) is focused on CP-CRE, but we are also interested in learning about practices related to the identification, surveillance, and control of all CRE. Responses to the survey will help us to understand current implementation of the VHA CP-CRE guidelines and to identify best practices and recommendations to support implementation across VA facilities. You are being asked to participate because of your role in infection control implementation. We encourage you to also seek input from other staff for those questions you are unfamiliar with or unable to answer. The survey should take approximately 15minutes to complete.

1. Facility and station number: DROP down menu
2. VISN number: Drop down menu
3. Are you the MDRO Prevention Coordinator (MPC) for a:

Acute Care Facility (AC) Community Living Center (CLC)  Both AC & CLC

1. Is CRE a reportable disease in your state?

Yes No  Don’t know

- 1. If yes, do you report it to your state?

Yes No  Don’t know

1. Which guidelines or recommendations are you using for prevention of CRE/CP-CRE? (check all that apply) [Inner setting: Implementation climate, Compatibility]

VHA 2015 Guideline for Control of CRE  VHA 2017 Guideline for Control of CP-CRE

State Guideline (Specify state guideline your VAMC is using?: _______)

CDC CRE Toolkit 2012  AHRQ CRE Control and Prevention Kit

CDC CRE Toolkit 2015  Local policy

Other: _________________________  None

1. Based on your knowledge of your facility, please indicate all that apply to your facility: [Inner setting: Structural characteristics]

My VAMC has experienced a CRE/CP-CRE outbreak in the last year

My VAMC is located in a region known to have a high prevalence of CRE/CP-CRE

CRE/CP-CRE is increasing at my facility

The incidence of new CRE/CP-CRE patients is ~< 1 per month at my VAMC

The incidence of new CRE/CP-CRE patients is ~ ≥ 1 per month at my VAMC

We have not seen any CRE/CP-CRE cases at our VAMC

None of these apply to my facility

1. The VHA CRE/CP-CRE guideline recommends a review of past clinical cultures or surveillance screenings to identify previously unrecognized patients/residents with bacteria meeting the CRE/CP-CRE definition. Did you or anyone else at your VAMC conduct this retrospective review of past cultures? [Process: Execution]

Yes (please continue below) (go to question 6a)  No (skip to question 8)

Don’t know (skip to question 8)

7a. Which method was used to conduct a retrospective review of past cultures? (check all that apply)

Line listing of all culture s  Antibiogram  Other (specify): ___________________

7b. How far back did you go for your retrospective review of past cultures?

Less than 6 months  6-12 months  12-24 months  Greater than 24 months

7c. Based on this review, what actions were taken? (check all that apply) [Process: Execution]

Reported to VHA MDRO program office  Entered into VHA IPEC (Inpatient Evaluation Center)

Reported to hospital Infection control  Reported to hospital Antimicrobial stewardship program

Reported to hospital Patient safety  Reported to hospital administration

Instituted ongoing prospective surveillance  Reported to State or Local Health Department

Other: ____________________________  No action was taken

I don’t know what action was taken

1. Do you *routinely* screen (or conduct active surveillance) for CRE/CP-CRE colonization in patients at your hospital? [Process: Execution]

Yes (go to question 8a)  No (skip to question 9)

8a. Do you have an admission screening algorithm to identify high risk patients?

Yes  No

8b. Which patients are *routinely* screened for CRE/CP-CRE colonization? (check all that apply)

Patients/residents previously colonized or infected with CRE/CP-CRE

Patients transferred from a facility known to have CRE/CP-CRE

Patients transferred from a long-term acute care hospital (LTACH) or chronic ventilator facility

Persons who have been recently hospitalized outside the U.S.

Patients/residents who have received solid organ, stem cell, or bone marrow transplantation

Patients admitted to your ICU

Patients admitted to your long-term care facility

Patients admitted to the spinal cord injury unit or patients with spinal cord injury

All patients admitted to my facility (ICU and non-ICU)

Other: ________________________________________________

8c. When are patients screened for CRE/CP-CRE? [Process: Execution]

On admission  Periodically (every ________ days)  Other (specify):____________

8d. What steps occur prior to swabbing the patient? (check all that apply) [Process: Execution]

The patient is told *verbally* the reason why they are being swabbed.

The patient is educated about CRE and MDROs *using* patient brochures that are *given* to the patient.

Oral consent is obtained from the patient for the swab to occur.

Documentation of the consent obtained from the patient is recorded in CPRS.

None of these steps are completed.

Other: _______________________________

8e. Which anatomic sites do you routinely swab for CRE/CP-CRE surveillance? (check all that apply) [Process: Execution]

Rectal  Perianal/PeriRectal  Stool  Other: ______________

8f. What is the average turnaround time for CRE/CP-CRE screening laboratory results from a rectal screen swab or sample after sample/swab is obtained? (check one)

< 12 hours  12 – 24 hours  25 – 48 hours  49-72 hours  >72 hours

1. We are not screening for CRE because (check all that apply): [Inner setting: Implementation climate, Relative priority]

We don’t have a CRE/CP-CRE problem.

It is difficult to identify who is at high risk.

We are not sure who is at high risk.

We don’t have the resources.

We don’t have a screening protocol.

We are planning to screen, but the policy is not approved yet.

Other: ______________________________________

I don’t know why we are not screening for CRE.

Not Applicable

1. If a patient has a positive culture for CRE/CPE and was not placed in contact precautions prior to notification of them being positive, we will screen: (check all that apply) [Process: Execution]

All patients in that unit

Patients sharing a room or bathroom with the case

Patients who share healthcare providers with the case

Patients who were in close proximity with the case

Other: _________________________________

No one else.

I don’t know.

1. At your facility, is there a CPRS alert or flag available to notify providers of patients with or a history of CRE/CP-CRE? [Inner setting: Structural characteristics]

Yes (go to question 11a)  No (go to question 12)  I don’t know (go to question 12)

11a. When is the flag for CRE/CP-CRE discontinued?

When the patient is discharged

After 1 year

Never

Other: ___________________________________________________

I don’t know

1. Which type of infection control processes are implemented after a patient tests positive for CRE/CP-CRE? (check all that apply) [Process: Execution]

Contact precautions  Patient cohorting in same room, ward or area

Nurse cohorting in same ward or area  Other: _____________________________________

Not applicable

1. When a CRE/CP-CRE-positive patient is transferred to your facility, how often does the transferring facility communicate to your facility or the patient’s doctor the patient’s CRE/CP-CRE status? [Outer setting: External policies and incentives; Inner setting: Networks and communications]

| **Transferring facility** | Never | Seldom | Half the time | Usually | Always | I don’t know | N/A |
| --- | --- | --- | --- | --- | --- | --- | --- |
| 1. Non-VA Skilled nursing facility |  |  |  |  |  |  |  |
| 1. Non-VA Long term acute care hospital |  |  |  |  |  |  |  |
| 1. Non-VA Acute care hospital |  |  |  |  |  |  |  |
| 1. VA Skilled nursing facility |  |  |  |  |  |  |  |
| 1. VA Long term acute care hospital |  |  |  |  |  |  |  |
| 1. VA Acute care hospital |  |  |  |  |  |  |  |

1. When a CRE/CP-CRE-positive patient is transferred **from** your facility **to** another facility, how do you communicate the patient’s CRE/CP-CRE status to the facility to which the Veteran is being transferred? (check all that apply) [Inner setting: Structural characteristics]

Verbal communication by nursing  Written communication

Verbal communication by the attending physician  Electronic communication

Verbal communication by infection control  Verbal communication by microbiology

Verbal communication by the antimicrobial stewardship program

Other: __________________________________  Inter-facility transfer form

Don’t know

We don’t communicate this information to the other facility

Not applicable

1. Which group(s) were involved in developing and implementing your local CRE/CP-CRE algorithm or policies (check all that apply)? (check all that apply) [Process: Engagement]

Attending physician  Infection control  Antimicrobial stewardship program

Infectious disease  Patient safety  Hospital administration

Nursing administration  Chief of Staff  Pharmacy

Other: ________________________________________________

Laboratory personnel  I don’t know  We don’t have a local policy

1. What type of training and/or information did you receive related to the CRE/CP-CRE guidelines? (select all that apply) [Inner setting: Available resources]

VA CRE conference(s)

MDRO Program Office CRE Webinars (April 2015)

Facility-provided CRE training

Non-VA Online training related to CRE, If selected specify: ____________________

Provided a copy of the 2015 VA CRE guidelines

Provided a copy of the 2017 VA CRE guidelines

Received copy of and/or an online link to CRE educational materials for patients

Email communications

Other: ______________________________________

I did not receive any information or training related to the CRE algorithms.

1. Please note the extent to which you agree or disagree with the following statements related to the VHA 2017 CRE/CP-CRE guidelines:

| **Statement** | Strongly Agree | Agree | Neutral | Disagree | Strongly Disagree |
| --- | --- | --- | --- | --- | --- |
| 1. I am knowledgeable about the guidelines. [Characteristics of the individual: Knowledge and beliefs] |  |  |  |  |  |
| 1. I feel comfortable executing the steps detailed in the guidelines that are associated with my role. [Characteristics of the individual: Self-efficacy] |  |  |  |  |  |
| 1. The guidelines provide clear information on activities I need to do my job. [Inner setting: Readiness for Implementation, Access to knowledge and information] |  |  |  |  |  |
| 1. The guidelines will help to prevent and/or reduce CRE/CP –CRE in my facility. [Intervention characteristics: Relative advantage] |  |  |  |  |  |
| 1. The national leadership provides the resources that are needed to support the activities detailed in the guidelines. [Inner setting: Organizational leadership support] |  |  |  |  |  |
| 1. National leadership has adequately *distributed and disseminated* the guidelines. [Inner setting: Readiness for implementation, Leadership engagement] |  |  |  |  |  |
| 1. National leadership has provided adequate *education and training* resources to support the guidelines. [Inner setting: Readiness for implementation, Leadership engagement] |  |  |  |  |  |
| 1. The local leadership at my facility provides the resources that are needed to support the activities detailed in the guidelines. [Inner setting: Local-level leadership support] |  |  |  |  |  |
| 1. We have the *education and training resources* we need to accomplish the activities detailed in the guidelines. [Inner setting: Readiness for implementation, Available resources] |  |  |  |  |  |
| 1. We have the *staffing resources* we need to accomplish the activities detailed in the guidelines. [Inner setting: Readiness for implementation, Available resources] |  |  |  |  |  |
| 1. We have the *physical resources (e.g., patient rooms)* we need to accomplish the activities detailed in the guidelines. [Inner setting: Readiness for implementation, Available resources] |  |  |  |  |  |
| 1. We have the *laboratory resources* to accomplish the activities detailed in the guidelines. |  |  |  |  |  |
| 1. The guidelines facilitate accomplishment of VA goals of optimizing screening, identification, evaluation, and reporting. [Intervention characteristics: Design quality and packaging] |  |  |  |  |  |

18. To what extent are the CRE/CP-CRE guidelines implemented at your facility? [Process: Reflecting and evaluating]

Fully

Mostly

Partially

Not at all

18a. If you answered that CRE/CP-CRE guidelines are mostly, partially, or not at all implemented, what elements of the guideline are not implemented at your facility?

____________________________________________________________________________________________________________________________________________________________________________________________

19. What is your professional title/position? [Characteristics of the individual: Other personal attributes] ______________________________

20. How long have you been in this position? (choose one) [Characteristics of the individual: Other personal attributes]

<1 year  16-20 years

1-5 years  21-30 years

6-10 years  31-40 years

11-15 years  41+ years

1. Is the MPC position overseen by:

Infection Control  Front Office Administration

Quality Management  Nursing Service

Medicine Service  Other: __________________________

1. Are you assigned responsibilities in addition to your role as an MPC (i.e. Infection Preventionist, Employee Health, Quality Management)?

Yes  No

1. Does your facility have assigned Spinal Cord Injury Unit (SCIU) beds?

Yes  No

1. Number of Acute Care beds in your facility (include SCIU beds, if applicable)

<100

100-200

201-600

>600

No Acute Care beds

Other:____________________

1. Number of Community Living Center (CLC) beds for your facility (Include SCIU CLC beds, if applicable)

<50

51-75

76-100

>100

No CLC beds

Other:____________________

1. What is your highest level of education?

< High school  Bachelor’s degree (ie. BS, BA)

High school diploma/GED  Master’s degree (ie. MS, MA, MPH)

Associates degree  Doctoral degree (ie. PhD, MD, PharmD)

Other: specify _____________________

1. Barrier comments: Please share with us any barriers your facility has encountered related to CRE/CP-CRE or any additional information you would like us to know about.

______________________________________________________________________________________________

______________________________________________________________________________________________

______________________________________________________________________________________________

______________________________________________________________________________________________

1. Additional comments: Please share with us any activities you are engaged in related to CRE/CP-CRE or infection control or any additional information you would like us to know about.

______________________________________________________________________________________________

______________________________________________________________________________________________

______________________________________________________________________________________________

______________________________________________________________________________________________

1. We will be using survey data to identify facilities with certain characteristics that we’d like to learn more about and then contacting individuals at those facilities to invite them to participate in interviews. Please provide your email and phone number if you are interested in participating in an interview if your facility is selected.

Email: ________________________________________

Phone: ________________________________________
